# Supplementary material
Source: HighWire-hosted journal article supplement (https://rmdopen.bmj.com/content/6/3/e001321)
Supplement: inline-supplementary-material-3 [file inline-supplementary-material-3.pdf]

**Table S1. Questions asked during the concept elicitation interview**

| Interview section                                      | Topics discussed / Questions asked                                                                                                                                                                                                                                                                                                                                                                                                                                                                                                                                                                                                                                                                                                                                                                                                                                                                                                                                                                                                                                                                                                                                                                                                                                                                                                                                           |
|--------------------------------------------------------|------------------------------------------------------------------------------------------------------------------------------------------------------------------------------------------------------------------------------------------------------------------------------------------------------------------------------------------------------------------------------------------------------------------------------------------------------------------------------------------------------------------------------------------------------------------------------------------------------------------------------------------------------------------------------------------------------------------------------------------------------------------------------------------------------------------------------------------------------------------------------------------------------------------------------------------------------------------------------------------------------------------------------------------------------------------------------------------------------------------------------------------------------------------------------------------------------------------------------------------------------------------------------------------------------------------------------------------------------------------------------|
| Section 1 - Background                                 | <p>Patient was asked for:</p> <ul style="list-style-type: none"> <li>• Age, race / ethnicity, marital status, highest level of education, employment status, state of residence, and insurance type</li> <li>• To define their health. Patients had to choose one of the following answers: Excellent / Very good / Good / Fair / Poor</li> <li>• When they were first diagnosed with PsA, what brought them to the doctor at the time of first diagnosis and what they experienced at that time</li> <li>• Type of physician the patient first went to</li> <li>• Treatment(s) the patient received after being diagnosed with PsA and how this treatment affected their psoriatic arthritis (if at all)</li> <li>• Other treatments the patient had used/tried</li> <li>• How the psoriatic had arthritis changed over time</li> <li>• Current treatments for PsA and how they affected the patient's psoriatic arthritis (if at all)</li> <li>• Frequency of seeing their physician regarding the management / treatment of their Psoriatic Arthritis</li> </ul>                                                                                                                                                                                                                                                                                                          |
| Section 2 - Patient experienced symptoms – spontaneous | <p>In <b>section 2</b>, patients were asked for any symptoms in addition to those already mentioned in the first part that they were experiencing or had experienced in the past and that they attribute to PsA or its treatment.</p>                                                                                                                                                                                                                                                                                                                                                                                                                                                                                                                                                                                                                                                                                                                                                                                                                                                                                                                                                                                                                                                                                                                                        |
| Section 3 - Patient experienced symptoms – probed      | <p>In <b>section 3</b>, patients were asked about each symptom included in the preliminary conceptual model which had not been mentioned by the patient in sections 1 or 2.</p> <p>For each symptom mentioned in sections 2 and 3, the following questions were asked:</p> <ul style="list-style-type: none"> <li>• <i>In section 3 only:</i> Can you describe this symptom in your own words?</li> <li>• How often do/did you experience this symptom? Once a week or less? Two to three times a week? Once every day? Several times per day? All day?</li> <li>• When does/did the symptom occur? Morning / afternoon / evening / during the night/ throughout the day and night? Do you experience flare-ups? Does this symptom become more severe during a flare?</li> <li>• How severe is/was this symptom? Is severity constant or does it vary? Explain.</li> <li>• Do you experience variations in the severity of this symptom</li> <li>• How bothersome is it?</li> <li>• How long does/did the symptom last? Is there anything in particular that causes/caused this symptom to occur? Anything that makes it worse? Last longer? Etc.?</li> <li>• Is there variation in how long this symptom lasts? (i.e. does it last longer on certain days or does it last longer at a specific time of day)</li> <li>• What do you do to help ease this symptom?</li> </ul> |

| Interview section                                     | Topics discussed / Questions asked                                                                                                                                                                                                                                                                                                                                                                                                                                                                                                                                                                                                                                                                                                                                                                                                                                                                                                                                                                                                                         |
|-------------------------------------------------------|------------------------------------------------------------------------------------------------------------------------------------------------------------------------------------------------------------------------------------------------------------------------------------------------------------------------------------------------------------------------------------------------------------------------------------------------------------------------------------------------------------------------------------------------------------------------------------------------------------------------------------------------------------------------------------------------------------------------------------------------------------------------------------------------------------------------------------------------------------------------------------------------------------------------------------------------------------------------------------------------------------------------------------------------------------|
|                                                       | <ul style="list-style-type: none"> <li>• Has the symptom been improving, getting worse, or staying the same since you first started to experience symptoms associated with Psoriatic Arthritis? Why? Do you think the improvement or worsening is related to the course of the disease, or does it have anything to do with the treatment you are receiving or have received?</li> <li>• On a scale of 0 to 10, where 0 means that this symptom does not disturb your life at all and a 10 means that this symptom greatly disturbs your life, how much does this symptom disturb your life? <i>(If the word “disturb” was unclear to the participant, the terminology “negatively impact” was used instead. If the participant indicated that the symptom disturbance had varied, he/she was asked about a symptom ranking now vs. when the symptom was at its worst)</i></li> </ul>                                                                                                                                                                      |
| Section 4 - Patient experienced impacts – spontaneous | <p>In <b>section 4</b>, patients were asked in what ways their life had been impacted or affected by the psoriatic arthritis. Patients were told that this included effects on your daily activities, work, leisure, or social life as well as financial or emotional effects.</p>                                                                                                                                                                                                                                                                                                                                                                                                                                                                                                                                                                                                                                                                                                                                                                         |
| Section 5 - Patient experienced impacts – probed      | <p>In <b>section 5</b>, the patient was asked about each impact included in the preliminary conceptual model which had not been mentioned by the patient in section 4.</p> <p>For each impact mentioned in sections 4 and 5, the following questions were asked:</p> <ul style="list-style-type: none"> <li>• How often did the impact occur (if applicable)?</li> <li>• How had the impact changed over time? (e.g., before/after treatment, surgery, etc.)</li> <li>• If the patient thought that the impact was related to a specific symptom, or to their treatment</li> <li>• If there were things that the patient used to do, that you no longer did, or did less because of the Psoriatic Arthritis. How important their ability to do these things was</li> <li>• On a scale of 0 to 10, where 0 means that this impact does not disturb your life at all and a 10 means that this impact greatly disturbs your life, how much does this impact disturb your life? <i>(Current impact and when impact was at its worst was probed)</i></li> </ul> |
