# Supplementary material
Source: HighWire-hosted journal article supplement (https://rmdopen.bmj.com/content/6/3/e001321)
Supplement: inline-supplementary-material-4 [file inline-supplementary-material-4.pdf]

**Table S3. Impacts identified in the targeted literature review**

| <b>Disease-related impacts</b> | <b>No. of article mentions (n=15)</b> | <b>Impact Salience*</b> |
|--------------------------------|---------------------------------------|-------------------------|
| Physical disability            | 10 (67%)                              | High                    |
| Social participation           | 10 (67%)                              | High                    |
| Sleep disturbance              | 10 (67%)                              | High                    |
| Emotional impact               | 10 (67%)                              | High                    |
| Family relationships           | 9 (60%)                               | High                    |
| Depression                     | 9 (60%)                               | High                    |
| Anxiety                        | 8 (53%)                               | High                    |
| Work disability                | 7 (47%)                               | High                    |
| Effect on daily activities     | 7 (47%)                               | Intermediate            |
| Loss of independence           | 6 (40%)                               | Intermediate            |
| Loss of leisure time           | 5 (33%)                               | Intermediate            |
| Fear / Frustration             | 5 (33%)                               | Intermediate            |
| Health care costs              | 5 (33%)                               | Intermediate            |
| Coping with disease            | 4 (27%)                               | Intermediate            |
| Embarrassment                  | 4 (27%)                               | Intermediate            |
| Negative body image            | 4 (27%)                               | Intermediate            |
| Impact on sexual functions     | 4 (27%)                               | Intermediate            |
| Other impacts                  | <3 (20%)                              | Low                     |

\*High corresponded to impacts mentioned in >50% of articles, intermediate to impacts mentioned in 25-49% of articles, and low impacts mentioned in <25% of articles.
