# Supplementary material
Source: HighWire-hosted journal article supplement (https://rmdopen.bmj.com/content/6/3/e001321)
Supplement: inline-supplementary-material-5 [file inline-supplementary-material-5.pdf]

**Table S2. Signs and symptoms identified in the targeted literature review**

| <b>Disease-related signs/symptoms</b>    | <b>No. of article mentions (n=15)</b> | <b>Reported prevalence range</b> | <b>Symptom salience*</b> |
|------------------------------------------|---------------------------------------|----------------------------------|--------------------------|
| Pain (skin, joint, muscle, spine)        | 14 (93%)                              | 65%–95%                          | High                     |
| Fatigue                                  | 12 (80%)                              | 57%–84%                          | High                     |
| Skin symptoms (itching, red, scaly, etc) | 9 (60%)                               | 25%-76%                          | High                     |
| Stiffness                                | 7 (47%)                               | 77%                              | High                     |
| Swollen / Inflamed joints                | 7 (47%)                               | --                               | High                     |
| Gastrointestinal distress                | 2 (13%)                               | 12%-75%                          | High                     |
| Nail symptoms (pitting, lifting)         | 6 (40%)                               | 21%                              | Intermediate             |
| Dactylitis (“sausage fingers”)           | 5 (33%)                               | 45%                              | Intermediate             |
| Musculoskeletal symptoms                 | 5 (33%)                               | --                               | Intermediate             |
| Impaired grip strength                   | 5 (33%)                               | --                               | Intermediate             |
| Deformed joints                          | 3 (20%)                               | --                               | Intermediate             |
| Respiratory symptoms                     | 2 (13%)                               | 19%                              | Intermediate             |
| Difficulty swallowing / biting           | 2 (13%)                               | --                               | Low                      |
| Impaired vision                          | 2 (13%)                               | --                               | Low                      |
| Limited dexterity                        | 2 (13%)                               | --                               | Low                      |
| Paresthesia                              | 1 (2%)                                | --                               | Low                      |

\*High corresponded to prevalence higher than 75% and/or concept mentioned in >50% of articles; intermediate corresponded to prevalence of 30-74% and/or mentioned in 30-50% of articles; low corresponded to prevalence below 30% and/or mentioned in <30% of articles.
