# Supplementary material
Source: HighWire-hosted journal article supplement (https://rmdopen.bmj.com/content/6/3/e001321)
Supplement: inline-supplementary-material-6 [file inline-supplementary-material-6.pdf]

## List of studies included in the literature review

- Chrisholm A, Pearce C, Chinoy H, et al. Distress, misperceptions, poor coping and suicidal ideation in psoriatic arthritis: a qualitative study. *Rheumatology*, 2016. doi: 10.1093/rheumatology/kew009.
- Dures E, Hewlett S, Lord J, et al. Important treatment outcomes for patients with psoriatic arthritis: a multisite qualitative study. *Patient*, 2017. doi: 10.1007/s40271-017-0221-4.
- Gossec L, de Wit M, Kiltz U, et al. A patient-derived and patient-reported outcome measure for assessing psoriatic arthritis: elaboration and preliminary validation of the psoriatic arthritis impact of disease (PsAID) questionnaire, a 13-country EULAR initiative. *Annals of the Rheumatic Diseases*, 2014. doi: 10.1136/annrheumdis-2014-205207.
- Husted J, Tom B, Farewell V, et al. Longitudinal analysis of fatigue in psoriatic arthritis. *Journal of Rheumatology*, 2010. doi: 10.3899/jrheum.100179.
- Kavanaugh A, Helliwell P, and Ritchlin C. Psoriatic arthritis and burden of disease: patient perspectives from the population-based multinational assessment of psoriatic and psoriatic arthritis (MAPP) survey. *Rheumatology and Therapy*, 2016. doi: 10.1007/s40744-016-0029-z.
- McKenna S, Whalley D, Tennant A, et al. Development of the PsAQoL: a quality of life instrument specific to psoriatic arthritis. *Annals of the Rheumatic Diseases*, 2004. doi: 10.1136/ard.2003.006296.
- Mease P and Armstrong A. Managing patients with psoriatic disease: the diagnosis and pharmacologic treatment of psoriatic arthritis in patients with psoriasis. *Drugs*, 2014. doi: 10.1007/s40265-014-0191-y.
- Michelsen B, Fiane R, Diamantopoulos A, et al. A comparison of disease burden in rheumatoid arthritis, psoriatic arthritis, and axial spondyloarthritis. *PLoS One*, 2015. doi: 10.1371/journal.pone.0123582.
- Moverley A, Vinall-Collier K, and Helliwell P. It's not just the joints, it's the whole thing: a qualitative analysis of patients' experience of flare in psoriatic arthritis. *Rheumatology*, 2015. doi: 10.1093/rheumatology/kev009.
- Nordbo E, Aamodt G, Ihlebaek C. Subjective health complaints in individuals with psoriasis and psoriatic arthritis: associations with the severity of the skin condition and illness perceptions- a cross-sectional study. *International Journal of Behavioral Medicine*, 2017. doi: 10.1007/s12529-017-9637-4.
- Orbai A, de Wit M, Mease P, et al. International patient and physician consensus on a psoriatic arthritis core outcome set for clinical trials. *Ann Rheum Dis*. 2017;76(4):673-80. doi: 10.1136/annrheumdis-2016-210242.
- Peluso R, Cafaro G, Di Minno, A, et al. Side effects of TNF-alpha blockers in patients with psoriatic arthritis: evidences from literature studies. *Clinical Rheumatology*, 2013. doi: 10.1007/s10067-013-2252-0.
- Simmons A and Fleischmann R. Living with psoriatic arthritis: a patient's and physician's perspective. *Rheumatology and Therapy*, 2016. doi: 10.1007/s40744-015-0024-9.

Stamm T, Hieblinger R, Bostrom C, et al. Similar problem in the activities of daily living but different experience: a qualitative analysis in six rheumatic conditions and eight European countries. *Musculoskeletal Care*, 2014. doi: 10.1002/msc.1047.

Stamm T, Nell V, Coenen M, et al. Concepts important to patients with psoriatic arthritis are not adequately covered by standard measures of functioning. *Arthritis and Rheumatism*, 2007. doi: 10.1002/art.22605.

Sunkureddi P, Doogan S, Heid J, et al. Evaluation of self-reported patient experiences: insights from digital patient communities in psoriatic arthritis. *Journal of Rheumatology*, 2018. doi: 10.3899/jrheum.170500.

Taylor W, Mease P, Adebajo A, et al. Effect of psoriatic arthritis according to the affected categories of the international classification of functioning, disability, and health. *Journal of Rheumatology*, 2010. doi: 10.3899/jrheum.091315.

#### **List of studies included in the revised analysis of the literature review**

Dures E, Hewlett S, Lord J, et al. Important treatment outcomes for patients with psoriatic arthritis: a multisite qualitative study. *Patient*, 2017. doi: 10.1007/s40271-017-0221-4.

Gossec L, de Wit M, Kiltz U, et al. A patient-derived and patient-reported outcome measure for assessing psoriatic arthritis: elaboration and preliminary validation of the psoriatic arthritis impact of disease (PsAID) questionnaire, a 13-country EULAR initiative. *Annals of the Rheumatic Diseases*, 2014. doi: 10.1136/annrheumdis-2014-205207.

Moverley A, Vinall-Collier K, and Helliwell P. It's not just the joints, it's the whole thing: a qualitative analysis of patients' experience of flare in psoriatic arthritis. *Rheumatology*, 2015. doi: 10.1093/rheumatology/kev009.

Orbai A, de Wit M, Mease P, et al. International patient and physician consensus on a psoriatic arthritis core outcome set for clinical trials. *Annals of the Rheumatic Diseases*, 2016. doi: 10.1136/annrheumdis-2016-210242.

Stamm T, Hieblinger R, Bostrom C, et al. Similar problem in the activities of daily living but different experience: a qualitative analysis in six rheumatic conditions and eight European countries. *Musculoskeletal Care*, 2014. doi: 10.1002/msc.1047.

Sunkureddi P, Doogan S, Heid J, et al. Evaluation of self-reported patient experiences: insights from digital patient communities in psoriatic arthritis. *Journal of Rheumatology*, 2018. doi: 10.3899/jrheum.170500.
