# Supplementary material
Source: HighWire-hosted journal article supplement (https://rmdopen.bmj.com/content/6/3/e001321)
Supplement: inline-supplementary-material-7 [file inline-supplementary-material-7.pdf]

**Table S4. Symptoms mentioned either spontaneously or when probed during the semi-structured interviews**

| <b>Symptom</b>                            | <b>Total Patients Mentioning (n-19)</b> | <b>Spontaneous Mentions</b> | <b>Probed Mentions</b> |
|-------------------------------------------|-----------------------------------------|-----------------------------|------------------------|
| Joint pain                                | 19                                      | 18                          | 1                      |
| Skin symptoms                             | 19                                      | 17                          | 2                      |
| Stiffness                                 | 19                                      | 8                           | 11                     |
| Swollen / inflamed joints                 | 19                                      | 16                          | 3                      |
| Fatigue                                   | 16                                      | 7                           | 9                      |
| Deformed joints                           | 15                                      | 9                           | 6                      |
| Impaired grip strength                    | 15                                      | 6                           | 9                      |
| Nail symptoms                             | 15                                      | 3                           | 12                     |
| "Sausage fingers / toes"                  | 12                                      | 11                          | 1                      |
| Dry eyes                                  | 11                                      | 3                           | 8                      |
| Muscle pain                               | 11                                      | 0                           | 11                     |
| Stability                                 | 11                                      | 1                           | 10                     |
| Limited dexterity                         | 10                                      | 2                           | 8                      |
| Muscle weakness                           | 10                                      | 2                           | 8                      |
| Sensitivity to sunlight                   | 10                                      | 2                           | 8                      |
| Bloating / diarrhea (side effect)         | 8                                       | 4                           | 4                      |
| Nausea / vomiting (side effect)           | 8                                       | 5                           | 3                      |
| Muscle spasms                             | 7                                       | 0                           | 7                      |
| Skin pain                                 | 7                                       | 2                           | 5                      |
| Back pain                                 | 6                                       | 6                           | 0                      |
| Decreased sense of touch                  | 6                                       | 1                           | 5                      |
| Hair loss (side effect)                   | 6                                       | 0                           | 6                      |
| Tendonitis / tendon pain                  | 6                                       | 6                           | 0                      |
| Bloating / diarrhea                       | 5                                       | 2                           | 3                      |
| Hair loss                                 | 5                                       | 0                           | 5                      |
| Impaired vision                           | 5                                       | 0                           | 5                      |
| Increased risk of infection (side effect) | 5                                       | 3                           | 2                      |

| <b>Symptom</b>                           | <b>Total Patients Mentioning (n-19)</b> | <b>Spontaneous Mentions</b> | <b>Probed Mentions</b> |
|------------------------------------------|-----------------------------------------|-----------------------------|------------------------|
| Bone aches ("flu-like")                  | 4                                       | 4                           | 0                      |
| Headache                                 | 4                                       | 1                           | 3                      |
| Shortness of breath                      | 4                                       | 1                           | 3                      |
| Warm around injection site (side effect) | 4                                       | 4                           | 0                      |
| Bone pain                                | 3                                       | 2                           | 1                      |
| Fever (side effect)                      | 2                                       | 1                           | 1                      |
| Neck pain / headache                     | 3                                       | 3                           | 0                      |
| Sacroiliac joint pain                    | 3                                       | 3                           | 0                      |
| Allergic reaction (side effect)          | 2                                       | 2                           | 0                      |
| Dry mouth                                | 2                                       | 2                           | 0                      |
| Fever                                    | 2                                       | 1                           | 1                      |
| Headache (side effect)                   | 2                                       | 0                           | 2                      |
| Increased risk of infection              | 2                                       | 0                           | 2                      |
| Decreased flexibility                    | 1                                       | 1                           | 0                      |
| Tingling limbs                           | 1                                       | 1                           | 0                      |
