# Supplementary material
Source: HighWire-hosted journal article supplement (https://rmdopen.bmj.com/content/6/3/e001321)
Supplement: inline-supplementary-material-8 [file inline-supplementary-material-8.pdf]

**Table S5. Impacts mentioned either spontaneously or when probed during the semi-structured interviews**

| <b>Impact</b>              | <b>Total Patients Mentioning (n-19)</b> | <b>Spontaneous Mentions</b> | <b>Probed Mentions</b> |
|----------------------------|-----------------------------------------|-----------------------------|------------------------|
| Sleep disturbance          | 19                                      | 13                          | 6                      |
| Effect on daily activities | 17                                      | 14                          | 3                      |
| Physical disability        | 17                                      | 15                          | 2                      |
| Frustration                | 16                                      | 8                           | 9                      |
| Emotional impact           | 15                                      | 8                           | 7                      |
| Embarrassment              | 14                                      | 10                          | 4                      |
| Loss of leisure time       | 14                                      | 11                          | 3                      |
| Depression                 | 13                                      | 5                           | 8                      |
| Work disability            | 13                                      | 12                          | 1                      |
| Anxiety / panic attacks    | 12                                      | 2                           | 10                     |
| Social participation       | 12                                      | 4                           | 8                      |
| Coping with disease        | 11                                      | 3                           | 8                      |
| Loss of independence       | 11                                      | 5                           | 6                      |
| Health care costs          | 10                                      | 4                           | 6                      |
| Family relationships       | 9                                       | 6                           | 3                      |
| Impact on sexual functions | 6                                       | 1                           | 5                      |
