# Supplementary material
Source: HighWire-hosted journal article supplement (https://rmdopen.bmj.com/content/6/3/e001321)

**Figure S1. PRISMA flow of the targeted literature review**

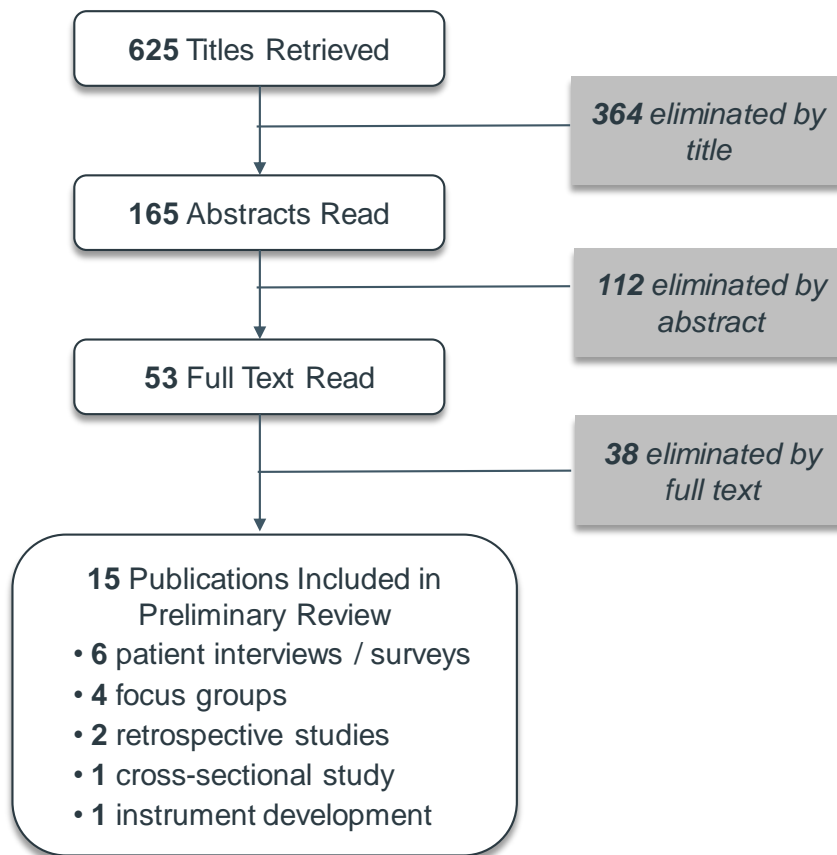

Supplement: inline-supplementary-material-1 [file inline-supplementary-material-1.pdf]

**Figure S2. Preliminary conceptual model**

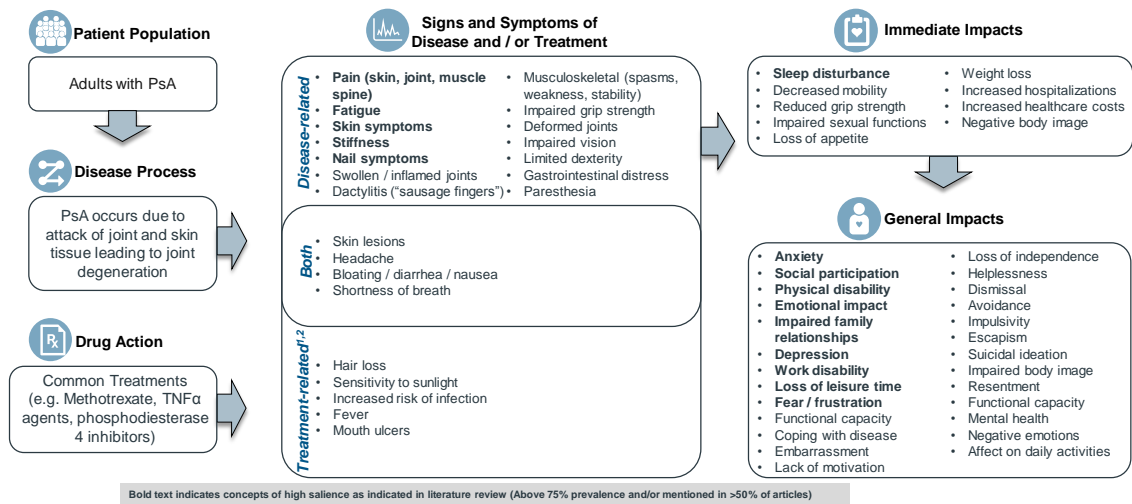

Supplement: inline-supplementary-material-2 [file inline-supplementary-material-2.pdf]
